# Supplementary material for: Vaccination-related attitudes and behavior across birth cohorts: Evidence from Germany
Source: PubMed Central journal article supplement (PMC8843242; doi:10.1371/journal.pone.0263871), 2022-02-14
Supplement: pone.0263871.s001.pdf [file pone.0263871.s001.pdf]

**S1 Table. Descriptive Statistics. Non-imputed and (last column) multiply imputed KIGGS data.**

| Variable                         | Original data |        |      |      |           | Imputed data |
|----------------------------------|---------------|--------|------|------|-----------|--------------|
|                                  | Obs.          | Mean/% | Min. | Max. | % missing | Mean/%       |
| 1st Measles at 24 months         | 14.007        |        | 0    | 1    | 0.0       |              |
| no                               |               | 26.2   |      |      |           | 26.2         |
| yes                              |               | 73.8   |      |      |           | 73.8         |
| Deliberate reasons               | 13.784        |        | 0    | 1    | 1.6       |              |
| no deliberate reasons            |               | 92.6   |      |      |           | 92.7         |
| 1+ deliberate reason(s)          |               | 7.4    |      |      |           | 7.3          |
| Convenience reasons              | 13.784        |        | 0    | 1    | 1.6       |              |
| no convenience reasons           |               | 98.6   |      |      |           | 98.6         |
| 1+ convenience reason(s)         |               | 1.4    |      |      |           | 1.4          |
| Cohort                           | 14.007        |        | 1    | 4    | 0.0       |              |
| 1987-1990                        |               | 21.8   |      |      |           | 21.8         |
| 1991-1994                        |               | 26.6   |      |      |           | 26.6         |
| 1995-1998                        |               | 27.7   |      |      |           | 27.7         |
| 1998-2002                        |               | 23.8   |      |      |           | 23.8         |
| Sex of child                     | 14.007        |        | 0    | 1    | 0.0       |              |
| male                             |               | 51.0   |      |      |           | 51.0         |
| female                           |               | 49.0   |      |      |           | 49.0         |
| Migration                        | 13.920        |        | 0    | 1    | 0.6       |              |
| native                           |               | 80.9   |      |      |           | 80.8         |
| migrant                          |               | 19.1   |      |      |           | 19.2         |
| Size of town                     | 14.007        |        | 0    | 1    | 0.0       |              |
| <100T                            |               | 50.8   |      |      |           | 50.8         |
| 100T+                            |               | 49.2   |      |      |           | 49.2         |
| Region                           | 14.007        |        | 0    | 1    | 0.0       |              |
| West Germany (& Berlin)          |               | 68.7   |      |      |           | 68.7         |
| East Germany (w/o Berlin)        |               | 31.3   |      |      |           | 31.3         |
| Education parents                | 13.882        |        | 1    | 3    | 0.9       |              |
| no/low/med. sec. degr.           |               | 4.8    |      |      |           | 4.9          |
| high sec. degr./voc. tr.         |               | 49.3   |      |      |           | 49.4         |
| higher tertiary degree           |               | 45.9   |      |      |           | 45.7         |
| Siblings                         | 13.677        |        | 0    | 1    | 2.4       |              |
| no older (half) siblings         |               | 46.4   |      |      |           | 46.2         |
| 1+ older (half) siblings         |               | 53.6   |      |      |           | 53.8         |
| Age mother                       | 13.786        |        | 0    | 1    | 1.6       |              |
| older                            |               | 16.5   |      |      |           | 16.4         |
| mother <36 yrs. when c. 2 yrs.   |               | 83.5   |      |      |           | 83.6         |
| Age first in nonpar. supervision | 13.775        |        | 0    | 98   | 1.7       |              |
| at age 0 [0]                     |               | 3.2    |      |      |           | 3.1          |
| at age 1 [1]                     |               | 14.9   |      |      |           | 15.0         |
| at age 2 [2]                     |               | 13.7   |      |      |           | 13.7         |
| at age 3 [3]                     |               | 34.0   |      |      |           | 33.9         |
| at age 4 to 6 [4]                |               | 15.7   |      |      |           | 15.7         |
| never [98]                       |               | 18.5   |      |      |           | 18.5         |
