# Supplementary material for: Vaccination-related attitudes and behavior across birth cohorts: Evidence from Germany
Source: PubMed Central journal article supplement (PMC8843242; doi:10.1371/journal.pone.0263871), 2022-02-14
Supplement: pone.0263871.s002.pdf [file pone.0263871.s002.pdf]

**S2 Table. Regression estimates of deliberate and convenience reasons to not vaccinate depicted in Fig 3.** Odds-Ratios from logistic regressions using weighted and multiply imputed data; <sup>(1)</sup> McFadden's R<sup>2</sup> derived using Rubin's combination rules and ignoring the clustered data structure; Significance: + p<0.10, \* p<0.05, \*\* p<0.01.

|                                                        | Deliberate reason(s) | Convenience reason(s) |
|--------------------------------------------------------|----------------------|-----------------------|
| Cohort (ref.: 1987-1990)                               |                      |                       |
| 1991-1994                                              | 0.87                 | 0.83                  |
| 1995-1998                                              | 0.66**               | 0.63+                 |
| 1998-2002                                              | 0.57**               | 0.39**                |
| Migrant                                                | 0.43**               | 0.59+                 |
| Large town 100T+                                       | 1.19+                | 1.15                  |
| East Germany (w/o Berlin)                              | 0.24**               | 0.72                  |
| Education parents (ref.: no/low/med. secondary degree) |                      |                       |
| high secondary degree/vocational training              | 2.02*                | 0.37**                |
| higher tertiary degree                                 | 4.39**               | 0.32**                |
| 1+ older (half) siblings                               | 1.04                 | 1.81**                |
| Age mother <36 years when child 24 m.                  | 0.68**               | 0.73                  |
| McFadden's R <sup>2</sup> <sup>(1)</sup>               | 0.073                | 0.028                 |
| N <sub>imputed</sub>                                   | 14,007               | 14,007                |
