# Supplementary material for: Vaccination-related attitudes and behavior across birth cohorts: Evidence from Germany
Source: PubMed Central journal article supplement (PMC8843242; doi:10.1371/journal.pone.0263871), 2022-02-14
Supplement: pone.0263871.s003.pdf [file pone.0263871.s003.pdf]

**S3 Table. Regression estimates of having received first measles vaccination at age of 24 month for three groups depicted in Fig 5.** Odds-Ratios from logistic regressions using weighted and multiply imputed data; <sup>(1)</sup>McFadden's R<sup>2</sup> derived using Rubin's combination rules and ignoring the clustered data structure; <sup>(2)</sup>N<sub>imputed</sub>: due to the imputation of some missing values on the reason variables the estimation sample differ slightly between the 25 sets of imputed data; Significance: + p<0.10, \* p<0.05, \*\* p<0.01.

|                                                  | With deliberate reason(s) | With convenience reason(s) | No reasons      |
|--------------------------------------------------|---------------------------|----------------------------|-----------------|
| Cohort (ref.: 1987-1990)                         |                           |                            |                 |
| 1991-1994                                        | 0.77                      | 1.15                       | 1.28**          |
| 1995-1998                                        | 0.51**                    | 0.29*                      | 1.74**          |
| 1998-2002                                        | 0.47**                    | 0.60                       | 3.21**          |
| Female                                           | 1.20                      | 1.16                       | 1.13*           |
| Migrant                                          | 0.90                      | 1.25                       | 0.71**          |
| Large town 100T+                                 | 0.98                      | 1.35                       | 1.06            |
| East Germany (w/o Berlin)                        | 1.17                      | 4.18*                      | 2.14**          |
| Education parents (ref.: no/low/med. sec. degr.) |                           |                            |                 |
| high secondary degree/vocational training        | 1.24                      | 67.71**                    | 1.53**          |
| higher tertiary degree                           | 0.71                      | 47.81**                    | 1.62**          |
| 1+ older (half) siblings                         | 0.70*                     | 0.37+                      | 0.57**          |
| Age mother <36 years when child 24 m.            | 1.28                      | 1.15                       | 1.02            |
| Non-parent. sup. (ref.: never)                   |                           |                            |                 |
| at age 0 [0]                                     | 0.90                      | 0.30                       | 0.89            |
| at age 1 [1]                                     | 1.59                      | 0.31+                      | 1.04            |
| at age 2 [2]                                     | 0.70                      | 0.41                       | 1.16            |
| at age 3 [3]                                     | 0.98                      | 0.90                       | 1.11            |
| at age 4 to 6 [4]                                | 1.36                      | 1.47                       | 1.11            |
| McFadden's R <sup>2</sup> <sup>(1)</sup>         | 0.053                     | 0.139                      | 0.050           |
| N <sub>imputed</sub> <sup>(2)</sup>              | 1,023 - 1,032             | 188 - 195                  | 12,868 - 12,877 |
