# Supplementary material for: Vaccination-related attitudes and behavior across birth cohorts: Evidence from Germany
Source: PubMed Central journal article supplement (PMC8843242; doi:10.1371/journal.pone.0263871), 2022-02-14
Supplement: pone.0263871.s004.pdf [file pone.0263871.s004.pdf]

**S4 Table. Regression estimates of vaccination behavior depicted in Fig 6.** Odds-Ratios from logistic regressions using weighted and multiply imputed data; <sup>(1)</sup> McFadden's R<sup>2</sup> derived using Rubin's combination rules and ignoring the clustered data structure; Significance: + p<0.10, \* p<0.05, \*\* p<0.01.

|                                                               | Odds Ratio |
|---------------------------------------------------------------|------------|
| Cohort (ref.: 1987-1990)                                      |            |
| 1991-1994                                                     | 1.29**     |
| 1995-1998                                                     | 1.76**     |
| 1998-2002                                                     | 3.23**     |
| Female                                                        | 1.14**     |
| Migrant                                                       | 0.73**     |
| Large town 100T+                                              | 1.05       |
| East Germany (w/o Berlin)                                     | 2.08**     |
| Education parents (ref.: no/low/med. Sec. degr.)              |            |
| high secondary degree/vocational training                     | 1.54**     |
| higher tertiary degree                                        | 1.64**     |
| 1+ older (half) siblings                                      | 0.58**     |
| Age mother <36 years when child 24 m.                         | 1.04       |
| Non-parent. sup. (ref.: never)                                |            |
| at age 0 [0]                                                  | 0.89       |
| at age 1 [1]                                                  | 1.08       |
| at age 2 [2]                                                  | 1.10       |
| at age 3 [3]                                                  | 1.10       |
| at age 4 to 6 [4]                                             | 1.14+      |
| <i>Interactions with deliberate &amp; convenience reasons</i> |            |
| Deliberate reason(s)                                          | 0.83       |
| Convenience reason(s)                                         | 0.02**     |
| Deliberate reas. # 1991-1994                                  | 0.56**     |
| Deliberate reas. # 1995-1998                                  | 0.29**     |
| Deliberate reas. # 1998-2006                                  | 0.14**     |
| Convenience reas. # 1991-1994                                 | 1.21       |
| Convenience reas. # 1995-1998                                 | 0.24*      |
| Convenience reas. # 1998-2006                                 | 0.28+      |
| Deliberate reas. # high sec. degr./voc. tr.                   | 0.75       |
| Deliberate reas. # higher tertiary degree                     | 0.37       |
| Convenience reas. # high sec. degr./voc. tr.                  | 38.37**    |
| Convenience reas. # higher tertiary degree                    | 51.61**    |
| McFadden's R <sup>2</sup> <sup>(1)</sup>                      | 0.100      |
| N <sub>imputed</sub>                                          | 14,007     |
